# Supplementary material
Source: HighWire-hosted journal article supplement (https://heartasia.bmj.com/highwire/filestream/136934/field_highwire_adjunct_files/1/heartasia-2014-010569supp_videocaption.pdf)
Supplement: heartasia-2014-010569supp_videocaption.pdf [file heartasia-2014-010569supp_videocaption.pdf]

**Video Caption:** Echocardiogram demonstrating severely impaired and dilated right heart with prominent trabeculation in the right ventricular (RV) apex and preserved left ventricular (LV) function
